# Supplementary material for: Synergistic Effects of Ladder and Cage Structured Phosphorus-Containing POSS with Tetrabutyl Titanate on Flame Retardancy of Vinyl Epoxy Resins
Source: MDPI journal article supplement (doi:10.3390/polym13091363), 2021-04-22
Supplement: s1 [file s1]

# **Synergistic effects of ladder and cage structured phosphorus-containing POSS with tetrabutyl titanate on flame retardancy of vinyl epoxy resins**

**Xu Han<sup>a,b</sup>, Xiaohua Zhang<sup>c</sup>, Ying Guo<sup>b</sup>, Xianyuan Liu<sup>b</sup>, Xiaojuan Zhao<sup>b,\*</sup>, Heng Zhou<sup>b,\*</sup>, Songli Zhang<sup>a,\*\*</sup> Tong Zhao<sup>b</sup>**

**<sup>a</sup> School of Materials Science and Engineering, Jiangsu University, Zhenjiang, 212013, China**

**<sup>b</sup> Key Laboratory of Science and Technology on High-Tech Polymer Materials, Institute of Chemistry, Chinese Academy of Science, Beijing, 100190, China**

**<sup>c</sup> Beijing University of Chemical Technology, Beijing, 100029, China**

**Correspondence**

**\*Heng Zhou, Key Laboratory of Science and Technology on High-Tech Polymer Materials, Institute of Chemistry, Chinese Academy of Science, Beijing, 100190, China**

**Email: zhouheng@iccas.ac.cn**

**\*Xiaojuan Zhao, Key Laboratory of Science and Technology on High-Tech Polymer Materials, Institute of Chemistry, Chinese Academy of Science, Beijing, 100190, China**

**Email: zhaoxj@iccas.ac.cn**

**\*\*Songli Zhang, School of Materials Science and Engineering, Jiangsu University, Zhenjiang, 212013, China**

**Email: 157807042@qq.com**

**Index of Figure and Table**

FIGURE S1 FTIR spectra of DOPO (a), VTES (b) and DOPO-VTES (c)

FIGURE S2 The  $^1\text{H}$ -NMR spectra of DOPO (a), VTES (b), DOPO-VTES (c)

FIGURE S3 FTIR spectra of DOPO -VTES (a), DOPO-POSS (b)

FIGURE S4  $^1\text{H}$ -NMR spectra of DOPO -VTES (a) and DOPO-POSS (b)

FIGURE S5  $^{29}\text{Si}$ -NMR spectra of DOPO-POSS

FIGURE S6 XRD pattern of DOPO-POSS

FIGURE S7 MALDI-TOF MS spectrum of DOPO-POSS

FIGURE S8 The curves of storage modulus and  $\tan \delta$  versus temperature of the VE composites

TABLE S1 DMA data of the VE composites

FIGURE S9 XPS spectra of Si2p (b), P2p (c), C1s (d), O1s (e) spectra for VE-2

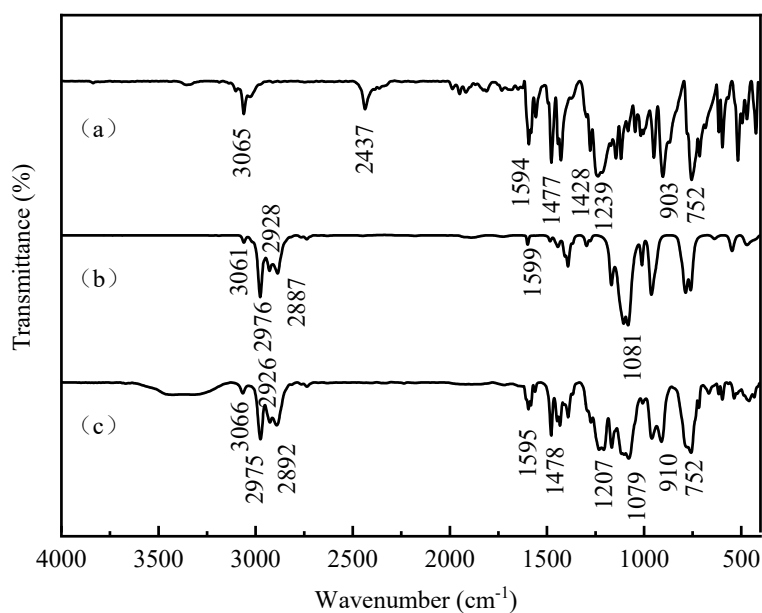

FIGURE S1 FTIR spectra of DOPO (a), VTES (b) and DOPO-VTES (c)

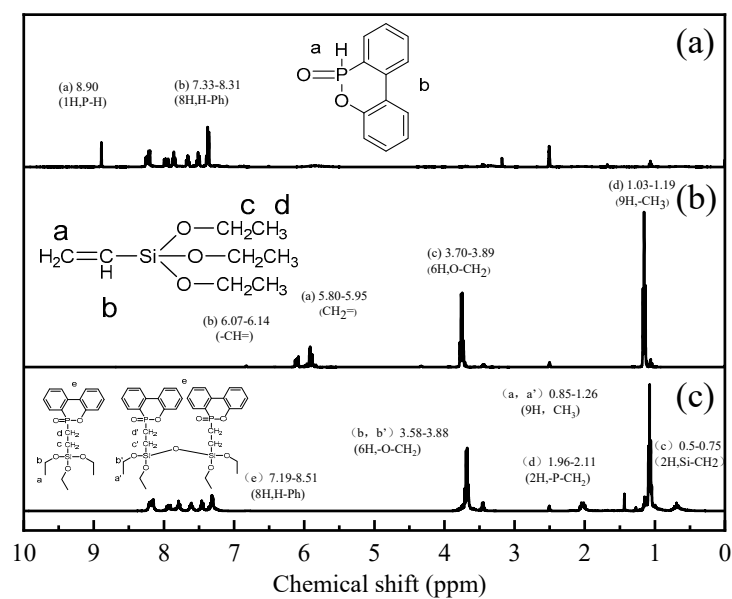

FIGURE S2 The  $^1\text{H}$ -NMR spectra of DOPO (a), VTES (b), DOPO-VTES (c)

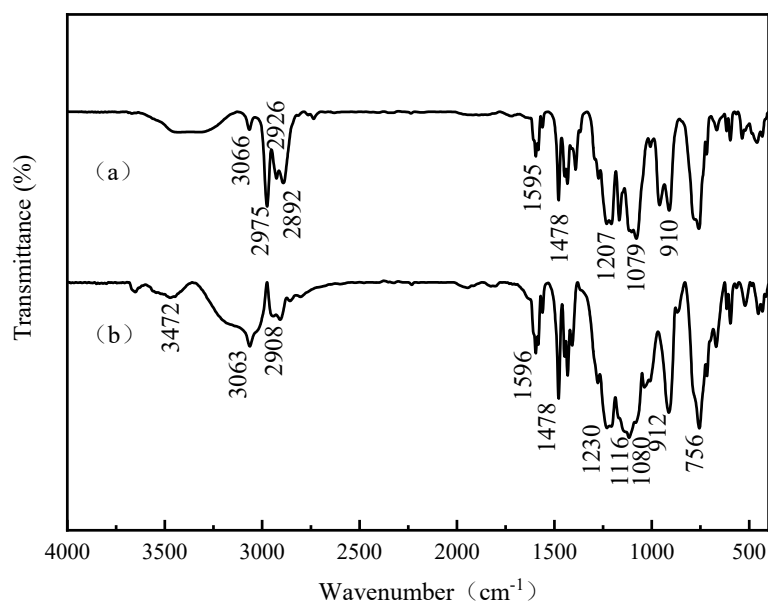

FIGURE S3 FTIR spectra of DOPO -VTES (a), DOPO-POSS (b)

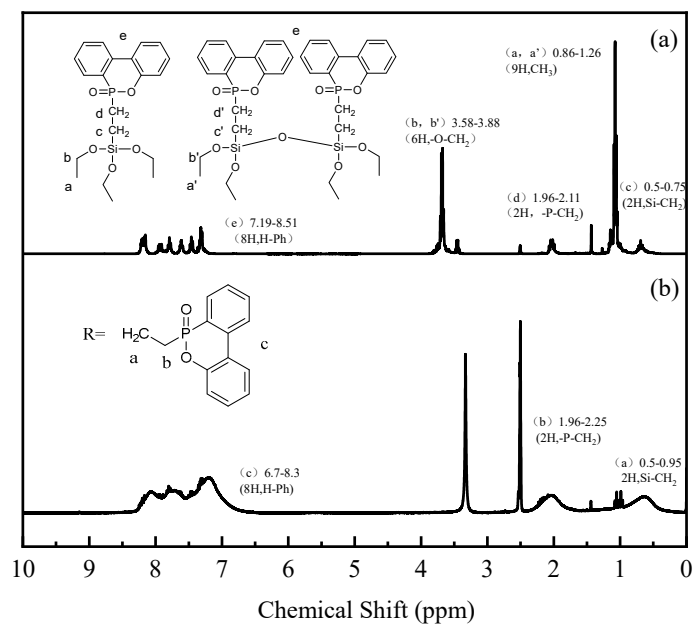

FIGURE S4  $^1\text{H}$ -NMR spectra of DOPO -VTES (a) and DOPO-POSS (b)

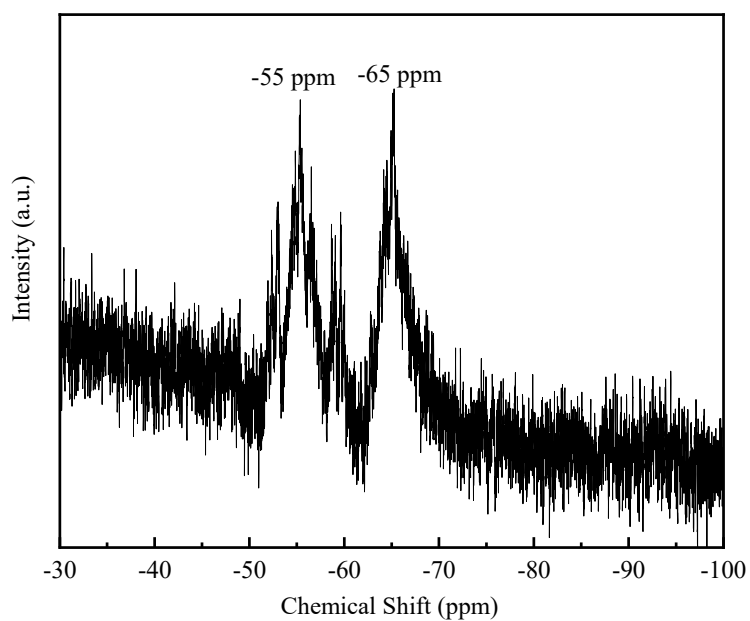

FIGURE S5  $^{29}\text{Si}$ -NMR spectra of DOPO-POSS

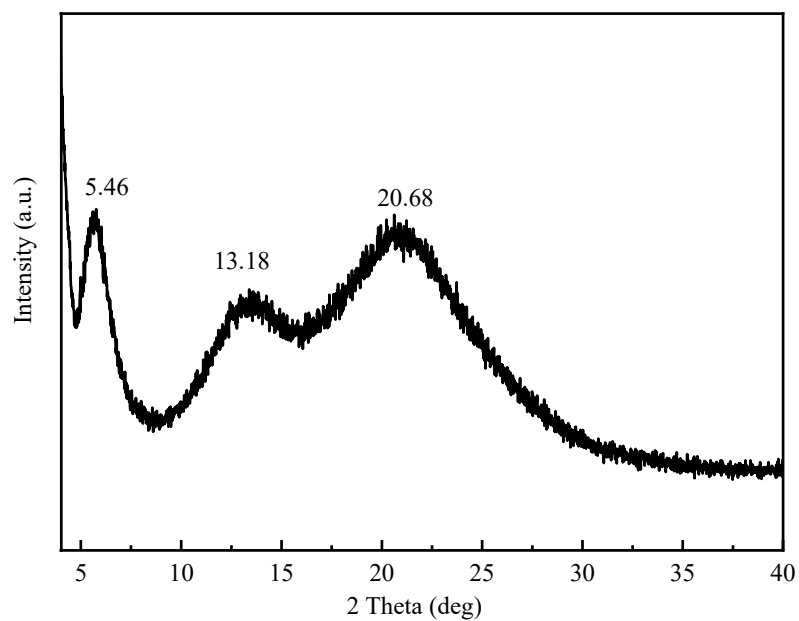

FIGURE S6 XRD pattern of DOPO-POSS

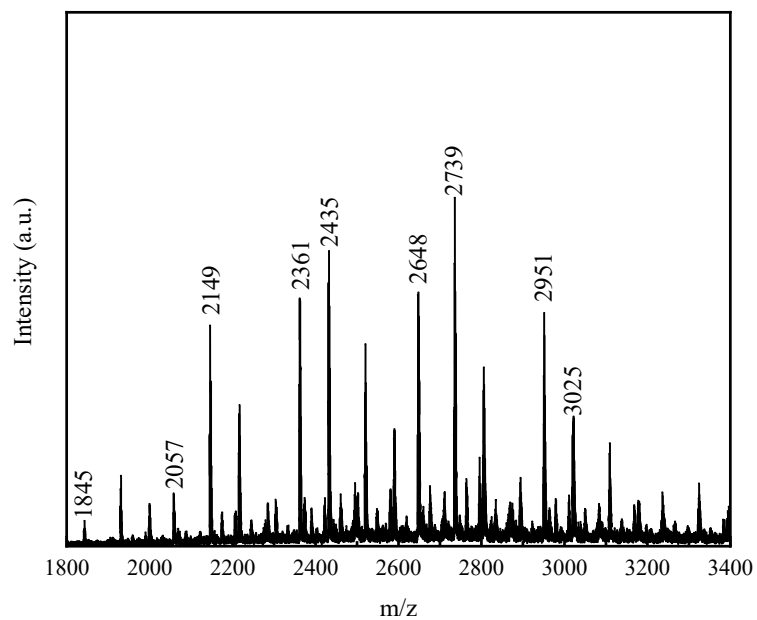

FIGURE S7 MALDI-TOF MS spectrum of DOPO-POSS

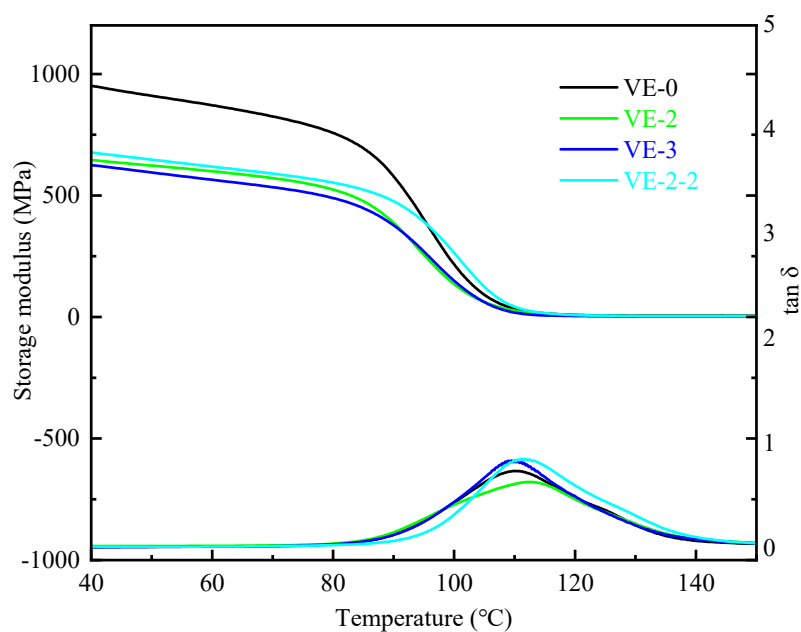

FIGURE S8 The curves of storage modulus and  $\tan \delta$  versus temperature of the VE composites

TABLE S1 DMA data of the VE composites

| Samples | $E'_{40^\circ\text{C}}$ (MPa) | $E'_{150^\circ\text{C}}$ (MPa) | $T_g$ ( $^\circ\text{C}$ ) |
|---------|-------------------------------|--------------------------------|----------------------------|
| VE-0    | 951.11                        | 4.97                           | 110.06                     |
| VE-2    | 646.10                        | 3.07                           | 112.81                     |
| VE-3    | 625.11                        | 2.60                           | 109.85                     |
| VE-2-2  | 675.69                        | 3.66                           | 111.43                     |

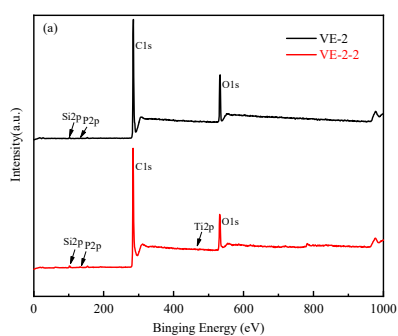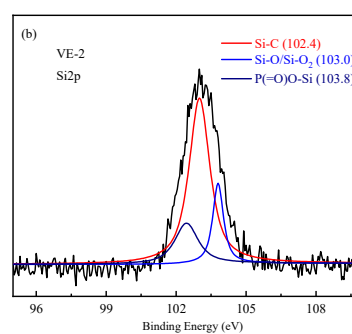

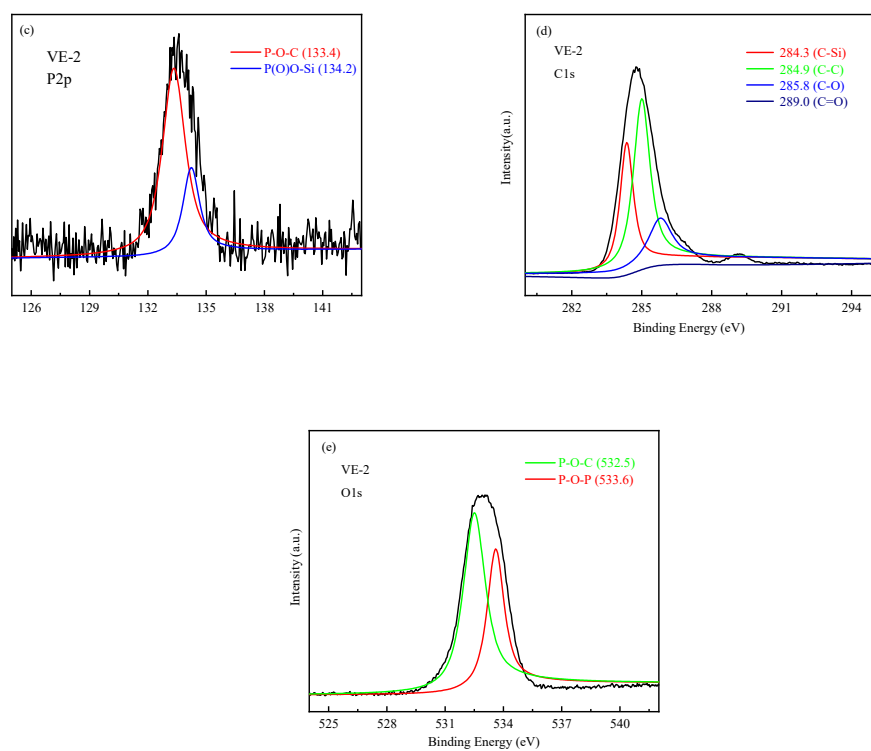

Figure S9 XPS spectra of Si2p (b), P2p (c), C1s (d), O1s (e) spectra for VE-2
